# Supplementary material for: Cannabis Use During Early Pregnancy Following Recreational Cannabis Legalization
Source: PubMed Central journal article supplement (PMC11530934; doi:10.1001/jamahealthforum.2024.3656), 2024-11-01
Supplement: jamahealthforum-e243656-s002.pdf [file jamahealthforum-e243656-s002.pdf]

## Data Sharing Statement

Young-Wolff. Cannabis Use During Early Pregnancy Following Recreational Cannabis Legalization. *JAMA Health Forum*. Published November 01, 2024.  
doi:10.1001/jamahealthforum.2024.3656

### Data

**Data available:** No
